# Supplementary material for: On the Efficacy of H2O2 or S2O82− at Promoting the Inactivation of a Consortium of Cyanobacteria and Bacteria in Algae-Laden Water
Source: MDPI journal article supplement (doi:10.3390/microorganisms10040735), 2022-03-29
Supplement: s1 [file s1]

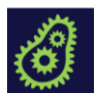

## Article

# On the efficacy of $\text{H}_2\text{O}_2$ or $\text{S}_2\text{O}_8^{2-}$ to promote the inactivation of a consortium of cyanobacteria and bacteria in algae-laden water

Javier Moreno-Andrés<sup>1, \*</sup>, Ignacio Rivas-Zaballos<sup>1</sup>, Asunción Acevedo-Merino<sup>1</sup> and Enrique Nebot<sup>1</sup>

<sup>1</sup> Department of Environmental Technologies, Faculty of Marine and Environmental Sciences. INMAR - Marine Research Institute, CEIMAR - International Campus of Excellence of the Sea. University of Cadiz. Spain

\* Correspondence: javier.moreno@uca.es

## SUPPLEMENTARY MATERIAL

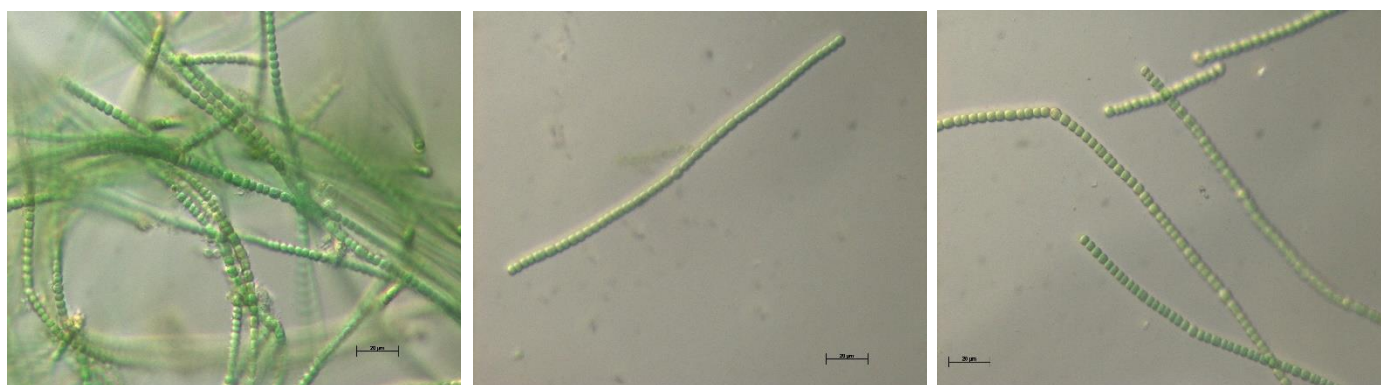

**Figure S1.** *Anabaena* sp (Strain: CCMM 01/0101, ICMAN-CSIC). The photographs have been taken with the help of Dr. Ignacio Moreno-Garrido, Department of Ecology and Coastal Management, Institute of Marine Sciences of Andalusia (ICMAN – CSIC).

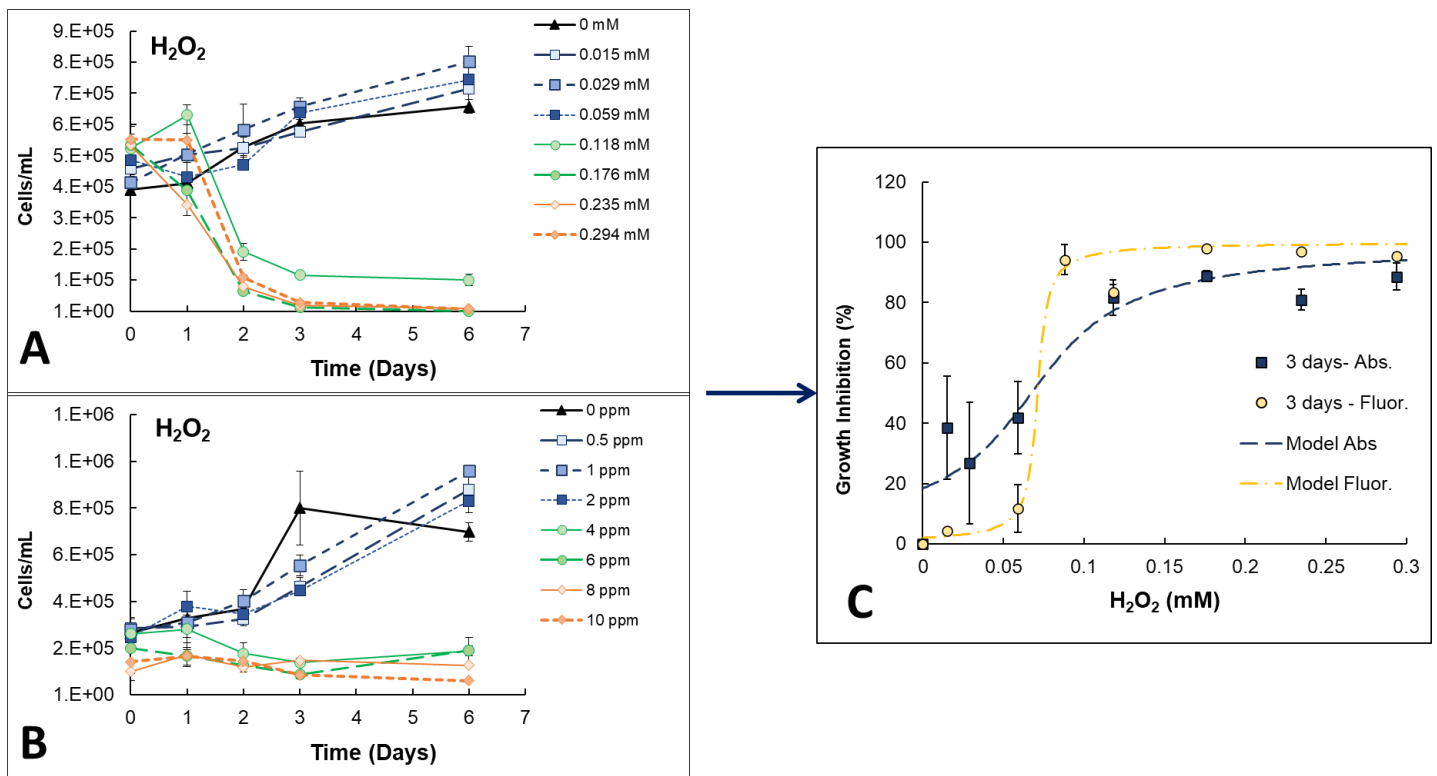

**Figure S2.** Growth curves of *Anabaena* sp. after adding different concentrations of  $H_2O_2$ . **A.** Cell density obtained by means of fluorescence measurements. **B.** Cell density obtained by means of absorbance ( $\lambda=680$  nm). **C.** Growth inhibition rate for *Anabaena* sp. at 72 h exposed to  $H_2O_2$  by means of fluorescence or absorbance measurements. The line plotted corresponds to the fit of the model used (see 2.3. Data treatment).
